# Supplementary material for: Lysosomal membrane glycoproteins bind cholesterol and contribute to lysosomal cholesterol export
Source: eLife journal article supplement (doi:10.7554/elife.21635), 2016-09-24
Supplement: supp [file elife-21635-supp-v1.zip]

# Lysosomal membrane glycoproteins bind cholesterol and contribute to lysosomal cholesterol export

Jian Li and Suzanne R. Pfeffer\*

Department of Biochemistry, Stanford University School of Medicine  
Stanford, CA USA 94305-5307

\*Correspondence to: pfeffer@stanford.edu.

**Abstract:** LAMP1 and LAMP2 proteins are highly abundant, ubiquitous, mammalian proteins that line the lysosome limiting membrane, and protect it from lysosomal hydrolase action. LAMP2 deficiency causes Danon's disease, an X-linked hypertrophic cardiomyopathy. LAMP2 is needed for chaperone-mediated autophagy, and its expression improves tissue function in models of aging. We show here that LAMP1 and LAMP2 bind cholesterol in a manner that buries the cholesterol 3 $\beta$ -hydroxyl group; they also bind tightly to NPC1 and NPC2 proteins that export cholesterol from lysosomes. Quantitation of cellular LAMP2 and NPC1 protein levels suggest that LAMP proteins represent a significant cholesterol binding site at the lysosome limiting membrane, and may signal cholesterol availability. Functional rescue experiments show that the ability of LAMP2 to facilitate cholesterol export from lysosomes relies on its ability to bind cholesterol directly.

Suzanne Pfeffer 9/17/2016 12:01 PM

**Deleted:** LAMP oligomeric state and NPC protein interaction in cells appear to be regulated by cholesterol levels.

## 26 **Introduction**

27 Eukaryotic lysosomes are acidic, membrane-bound organelles that contain proteases, lipases and  
28 nucleases and degrade cellular components to regenerate catabolic precursors for cellular use (1-  
29 3). Lysosomes are crucial for the degradation of substrates from the cytoplasm, as well as  
30 membrane bound compartments derived from the secretory, endocytic, autophagic and  
31 phagocytic pathways. The limiting membrane of lysosomes is lined with so-called lysosomal  
32 membrane glycoproteins (LAMPs) that are comprised of a short cytoplasmic domain, a single  
33 transmembrane span, and a highly, N- and O-glycosylated luminal domain (4-6). Because of  
34 their abundance and glycan content, LAMPs have been proposed to serve as a protective barrier  
35 to block hydrolase access to the limiting phospholipid bilayer. LAMP1 and LAMP2 are 37%  
36 identical and may overlap in function, but knockout of LAMP1 in mouse has a much milder  
37 phenotype than depletion of LAMP2 (7): LAMP2-deficient mice have very short lifespans, and  
38 show massive accumulation of autophagic structures in most tissues. Indeed, LAMPs are  
39 required for fusion of lysosomes with phagosomes (8) and LAMP2 has also been proposed to  
40 serve as a receptor for chaperone-mediated autophagy (9-11).

41

42 Previous work has implicated LAMP2 in cholesterol export from lysosomes, as LAMP-deficient  
43 cells show cholesterol accumulation that can be rescued by LAMP2 expression (12,13).  
44 Proteome-wide analysis of cholesterol binding proteins included LAMP1 and LAMP2 among a  
45 long list of candidate proteins (14). Despite these hints, the precise function of LAMP proteins  
46 has remained unclear, and they are often presumed to be structural components. We show here  
47 that LAMP proteins bind cholesterol directly and this capacity contributes to their role in  
48 cholesterol export from lysosomes.

## 49 Results and Discussion

50 We sought to verify direct cholesterol binding to LAMP proteins using LAMP protein luminal  
51 domains, engineered to be secreted from cells by simple deletion of their transmembrane and  
52 short cytoplasmic domains (Fig. 1-figure supplement 1; Fig. 1A). Soluble, purified, LAMP1 and  
53 LAMP2 proteins appeared to bind  $^3\text{H}$ -cholesterol saturably, at a stoichiometry comparable to  
54 equimolar amounts of purified, NPC1 N-terminal domain (NTD) that contains a single  
55 cholesterol binding site (15,16; Figs. 1B, D, E). (Note that this does not provide information  
56 about relative binding affinities.) Binding was not especially sensitive to pH (Fig. 1H) and was  
57 complete after ~2 hours at 4°C (Fig. 1I).

59 Cholesterol is poorly soluble, thus binding reactions were carried out in the presence of sub-  
60 critical micelle concentration amounts of Nonidet P40 detergent (0.004%) to help solubilize the  
61 cholesterol, as worked out by Infante et al. in their studies of cholesterol binding to the N-  
62 terminal domain of NPC1 protein (15). Under these conditions, most of the cholesterol remains  
63 in a mixed micelle of cholesterol and detergent and is still poorly soluble. Thus, the apparent  
64 affinity for cholesterol is likely to be tighter than the curves indicate, as the amounts added do  
65 not reflect the concentration of free cholesterol that is actually available for binding.

67 Preliminary experiments showed that  $^3\text{H}$ -cholesterol binding was competed by unlabeled  
68 cholesterol, 24-hydroxycholesterol, but not cholesterol sulfate (Fig. 1G). This suggested that  
69 binding occurs via the  $3\beta$ -hydroxyl moiety of the cholesterol molecule, similar to the orientation  
70 with which the NPC1 N-terminal domain binds cholesterol (16). Consistent with this, LAMP2  
71 also bound  $^3\text{H}$ -25-hydroxycholesterol with similar apparent affinity as cholesterol; binding was

Suzanne Pfeffer 9/17/2016 12:01 PM

Deleted: bound

Suzanne Pfeffer 9/17/2016 12:01 PM

Deleted: complete after a few hours at 4°C (Fig. 1C) and was

Suzanne Pfeffer 9/17/2016 12:01 PM

Deleted: concentrations

Suzanne Pfeffer 9/17/2016 12:01 PM

Deleted: Initial

Suzanne Pfeffer 9/17/2016 12:01 PM

Deleted: , H

Suzanne Pfeffer 9/17/2016 12:01 PM

Deleted: indicates

79 competed by excess cold 25-hydroxycholesterol (Fig. 1C), as would be expected for a specific  
80 interaction. Only low levels of background binding were detected using GFP-binding protein or  
81 TIP47 as controls (Fig. 1 D,E). More detailed analysis confirmed that 25-hydroxycholesterol  
82 (Fig. 2B) and 7-ketocholesterol (Fig. 2D), but not cholesterol sulfate (Fig. 2A), compete with <sup>3</sup>H-  
83 cholesterol for binding to LAMP2 protein.

84  
85 Epicholesterol is a cholesterol epimer that differs only in the chirality of carbon 3 such that the  
86 hydroxyl group is in the alpha rather than beta conformation. Importantly, epicholesterol failed  
87 to compete for cholesterol binding to LAMP2 protein under conditions where cholesterol  
88 competed for binding (Fig. 2C). It was not possible to add higher concentrations of sterol  
89 competitors due to solubility issues, but significant inhibition was observed. Together, these data  
90 strongly support the conclusion that cholesterol binds LAMP2 via its 3β-hydroxyl moiety.

91  
92 A slight stimulation of binding was seen in reactions containing low levels of competitor  
93 cholesterol sulfate or 25-hydroxycholesterol (Fig. 2A,B); this is presumably due to the higher  
94 solubility of these sterols, which will help solubilize <sup>3</sup>H-cholesterol present in the reaction's  
95 mixed micelles, and presumably make it more available for LAMP2 binding (see also ref. 15).  
96 Despite its somewhat higher solubility, 25-hydroxycholesterol did not appear to bind LAMP2  
97 much more tightly than cholesterol, at least as inferred from its ability to compete with  
98 cholesterol for binding (Figure 2B) or to bind directly (Fig. 1C).

99  
100 The LAMP protein family includes LAMP1, LAMP2, DC-LAMP, BAD-LAMP and Macrosialin  
101 (4). Each of these proteins contains a related "LAMP" domain; LAMP1 and LAMP2 proteins

Suzanne Pfeffer 9/17/2016 12:01 PM

Deleted: this conclusion and showed

Suzanne Pfeffer 9/17/2016 12:01 PM

Deleted: .

Suzanne Pfeffer 9/17/2016 12:01 PM

Deleted: lanosterol or

Suzanne Pfeffer 9/17/2016 12:01 PM

Deleted: , competed

Suzanne Pfeffer 9/17/2016 12:01 PM

Deleted: (Fig. 2); 25-hydroxycholesterol was more potent than 7-ketocholesterol as an inhibitor.

Suzanne Pfeffer 9/17/2016 12:01 PM

Deleted: reactions

Suzanne Pfeffer 9/17/2016 12:01 PM

Deleted: . Interestingly,

Suzanne Pfeffer 9/17/2016 12:01 PM

Deleted: ). This is quite different than the binding properties of the NPC1 N-terminal domain that shows strong preference for 25-hydroxycholesterol compared with cholesterol (15)

116 each contain two (Fig. 1-figure supplement 1). Soluble versions of the individual, membrane  
117 distal (“domain 1”) and membrane proximal (“domain 2”) LAMP domains of LAMP2 (Fig. 1A)  
118 bound cholesterol with different capacity: the N-terminal, domain 1 bound more cholesterol than  
119 its membrane proximal, domain 2 counterpart under these conditions (Fig. 1F). It is possible that  
120 both are capable of binding cholesterol within the full length molecule, as total domain 1 binding  
121 was less than that seen with the full length, secreted LAMP2 construct (Fig. 1F).

122

123 To verify that LAMP2 binds cholesterol in cells, soluble LAMP2 protein was expressed and  
124 purified from the secretions of HEK293F cells grown in protein-free, FreeStyle 293 Expression  
125 Medium that does not contain cholesterol. Under these conditions, any LAMP2-bound sterol  
126 must come from intracellular sources. We subjected freshly purified LAMP2 protein to  
127 chloroform:methanol extraction and analyzed the extract by thin layer chromatography. As  
128 shown in Fig. 3C, the LAMP2 extract contained a molecular species that co-chromatographed  
129 with cholesterol but not 24-hydroxy-, 25-hydroxy-, or 26-hydroxycholesterol, lanosterol or 7-  
130 beta-hydroxycholesterol. Mass spectrometry of the eluted material (Fig. 3B) confirmed a profile  
131 identical with purified cholesterol standard (Fig. 3C). These experiments show that LAMP2  
132 purified from cell secretions carries primarily, bound cholesterol.

133

134 NPC1 and NPC2 proteins mediate cholesterol export from lysosomes (16,17). NPC1 has 13  
135 transmembrane domains, and three large, luminal domains that are important for its function.  
136 As mentioned earlier, the NPC1 N-terminal domain binds cholesterol directly (16). Because of a  
137 possible connection between LAMP protein cholesterol binding and NPC-mediated cholesterol  
138 export, we checked for an interaction between these proteins. Membrane anchored, endogenous

Suzanne Pfeffer 9/17/2016 12:01 PM

Deleted: we subjected the freshly purified

Suzanne Pfeffer 9/17/2016 12:01 PM

Deleted: Fig. 4A shows that

141 LAMP2 co-immuno-precipitated with full length NPC1-GFP but not with the control protein,  
 142 GFP (Fig. 4A) or the lysosomal membrane protein, MCOLN1 (Fig. 4D), upon expression in  
 143 HEK293T cells (Fig. 4A). Interestingly, co-immunoprecipitation decreased in cells treated for 24  
 144 hours with cyclodextrin to remove cholesterol from lysosomes (18,19) and the plasma membrane  
 145 (Fig. 4B, C). These conditions (~ 0.1% cyclodextrin) have been shown to be non-toxic (cf. 20)  
 146 and did not alter cell growth rate or viability in our hands.

147

148 Purified, soluble LAMP2 protein also bound very tightly (and directly) to the N-terminal domain  
 149 of NPC1 protein (Fig. 5A, red) in the presence (or absence, not shown) of cholesterol ( $K_D=6\text{nM}$ ),  
 150 as monitored by microscale thermophoresis using AF647 dye-conjugated NPC1 protein—  
 151 binding significantly altered the fluorescence of NPC1 protein (Fig. 5C). No interaction was  
 152 observed for the control glycoprotein, RNase B (Fig. 5E). The smaller, NPC2 protein (Fig. 5B)  
 153 also bound to LAMP2 ( $K_D=122\text{nM}$ ), but ~20 fold less tightly than NPC1 N-terminal domain  
 154 (Fig. 5D); binding was monitored in the presence of cholesterol sulfate which will occupy the  
 155 binding site of NPC2 but not LAMP2 (Figs. 1 and 2). No binding was seen for NPC2 to the  
 156 control RNase B protein (Fig. 5F). Thus, LAMP2 binds directly to both NPC1 N-terminal  
 157 domain and NPC2 proteins. For NPC1, the enhanced binding seen in cells in the presence of  
 158 cholesterol does not appear to reflect occupancy of NPC1's N-terminal domain, as this variable  
 159 did not influence LAMP2 binding in solution. However, it is important to note that NPC1 also  
 160 likely binds cholesterol within its membrane spanning region which may also influence its  
 161 overall conformation (21,22).

162

Suzanne Pfeffer 9/17/2016 12:01 PM

Deleted: ,

Suzanne Pfeffer 9/17/2016 12:01 PM

Deleted: ,

Suzanne Pfeffer 9/17/2016 12:01 PM

Deleted: immuno-precipitation

Suzanne Pfeffer 9/17/2016 12:01 PM

Moved down [1]:

Suzanne Pfeffer 9/17/2016 12:01 PM

**Deleted:** LAMPs could also potentially serve as a sensor to signal cholesterol levels to cytoplasmic metabolic pathways. We therefore tested if the oligomeric state of LAMP protein was influenced by cholesterol availability; oligomerization could be somehow detected on the lysosome's cytoplasmic surface. LAMP1 dimers were readily detected in extracts of cells treated with cyclodextrin to chelate lysosomal cholesterol and crosslinked with dithiobis (succinimidyl propionate) (DSP) before lysis (Fig. 4D,E). Thus, when cholesterol is limiting, LAMP proteins appear to oligomerize; when cholesterol is available, they are instead free to associate with NPC1 protein (Fig. 4A-C). LAMP protein oligomerization has been previously reported (11).

Suzanne Pfeffer 9/17/2016 12:01 PM

Deleted: Fig

Suzanne Pfeffer 9/17/2016 12:01 PM

Deleted: protein

Suzanne Pfeffer 9/17/2016 12:01 PM

Moved (insertion) [1]

LAMP proteins are highly abundant components of the lysosome membrane and may serve as a reservoir for cholesterol extracted from intra-lysosomal membranes by NPC2, prior to cholesterol export from lysosomes by NPC1. [The term, reservoir, is meant to imply a holding station for cholesterol molecules that have been solubilized from the internal lipid contents of lysosomes by NPC2, and held closer to the limiting membrane, prior to NPC1-mediated export.]

Are LAMP proteins abundant enough to represent a cholesterol reservoir? We used purified LAMP2 and NPC1 proteins as standards to determine their precise abundance in HeLa and HEK293 cell lysates (Fig. 5-Fig. supplement 1). Using the polypeptide molecular weights and cellular protein determinations, we estimate that HeLa cells contain  $6.8 \times 10^6$  LAMP2 molecules per cell and  $3.7 \times 10^5$  NPC1 molecules per cell, or 18 fold more LAMP2 than NPC1; HEK293T cells contain  $2 \times 10^6$  LAMP2 molecules per cell and  $5.9 \times 10^5$  NPC1 molecules (3.6X fold more LAMP2).

Baby hamster kidney cells have been estimated to contain an absolute volume of  $\sim 37 \mu\text{m}^3$  lysosomes and prelysosomes per cell ( $3.7 \times 10^{-14}$  l) and a lysosome membrane area of  $370 \mu\text{m}^2$  (23). Assuming similar values for HeLa cells, this would represent a LAMP2 membrane density of 18,378 or 5676 molecules per  $\mu\text{m}^2$  in HeLa or 293T cell lysosomes, respectively, consistent with previous reports (6). For comparison, tightly packed viral spike glycoproteins occur at a density of 22,000 molecules per  $\mu\text{m}^2$  (24). We assume that LAMP1 will be of similar high density, together with LAMP2, practically lining the interior of the lysosome limiting membrane. In terms of concentrations, 37 femtoliters of lysosome volume would contain 0.3mM LAMP2-associated cholesterol binding sites in HeLa cell lysosomes (assuming one mole cholesterol

Suzanne Pfeffer 9/17/2016 12:01 PM  
Deleted: 20

Suzanne Pfeffer 9/17/2016 12:01 PM  
Deleted: 21

213 bound per more LAMP2). It does not seem unreasonable to consider this as a significant  
214 reservoir of cholesterol molecules that may be poised for transfer to NPC1 protein prior to  
215 export.

216

217 **Residues needed for cholesterol binding are needed for LAMP protein function**

218 The structure of an individual LAMP domain from DC-LAMP protein is comprised of a novel,  
219 beta-prism fold that appears to contain a hydrophobic pocket (4); we used this structure to model  
220 the structure of LAMP2 domain 1 (Fig. 6A). Site directed mutagenesis of hydrophobic residues  
221 predicted to line the walls of this cavity yielded purified LAMP2 proteins with impaired  
222 cholesterol binding activity. Thus, a soluble, LAMP2 domain 1-I<sup>111</sup>A/V<sup>114</sup>A construct yielded a  
223 secreted protein (Fig. 6B inset, right lane) that bound significantly less cholesterol than its wild  
224 type counterpart (Fig. 6B inset, left lane and panel B). Because these proteins were obtained  
225 from cell secretions, they are likely to be properly folded, as they escaped the endoplasmic  
226 reticulum's quality control machinery. These experiments show that residues facing the  
227 predicted, prism fold pocket are important for cholesterol binding and likely contribute to the  
228 cholesterol binding site.

229

230 Finally, to verify the importance of cholesterol binding to LAMP2 protein as part of its  
231 physiological role, we tested the ability of wild type and mutant LAMP2 constructs to rescue the  
232 cholesterol accumulation seen in lysosomes from mouse embryonic fibroblasts missing LAMP1  
233 and LAMP2 proteins (12,13). The ability of lysosomes to export cholesterol can be monitored  
234 by feeding cells cholesterol in the form of LDL, and using conversion of <sup>14</sup>C-oleic acid to  
235 cholesteryl oleate that takes place after endocytosed cholesterol is transported to the endoplasmic

Suzanne Pfeffer 9/17/2016 12:01 PM  
Deleted: (MEFs)



237 | reticulum (25). Previous work showed that LAMP1/2 knockout MEF cells were impaired in  
238 | cholesterol export using this assay (13).

Suzanne Pfeffer 9/17/2016 12:01 PM

Deleted: 19

239

240 | We used lentivirus transduction to test the ability of full length LAMP2, a membrane anchored  
241 | LAMP2 domain 1 (LAMP2-GFP Δ194-368; Fig. 1-figure supplement 1), or a membrane  
242 | anchored LAMP2 domain 1-I<sup>111</sup>A/V<sup>114</sup>A to rescue the ability of LAMP1/LAMP2 knockout MEF  
243 | cells to export LDL-derived cholesterol from lysosomes. For these experiments, we used LAMP  
244 | constructs containing a single LAMP domain, as full length LAMP2 constructs with mutations in  
245 | both LAMP domains failed to fold properly or be transported efficiently to lysosomes.

246

247 | It was important to first verify the precise amounts of each construct in lysosomes, to evaluate  
248 | any functional rescue findings. Flow cytometry analysis showed that the rescue constructs were  
249 | expressed at comparable levels in each stably expressing cell population (Fig. 6C). Light  
250 | microscopy confirmed that the constructs were capable of proper lysosome localization, as  
251 | determined by their colocalization with endogenous LAMP1 protein (Fig. 6E) in HeLa cells.  
252 | (Similar staining was observed in LAMP knockout MEF cells that lack LAMP protein markers).

253

254 | To fully confirm the folding of these artificial constructs, we analyzed their glycosylation status  
255 | and stability after addition of cycloheximide to inhibit new protein synthesis (Fig. 6—Figure  
256 | supplement 1). Full length GFP-LAMP2 protein migrated at ~140kD and its abundance was not  
257 | altered after 4 hours cycloheximide treatment, consistent with its long half life in cultured cells  
258 | (panel B). Similarly, the GFP-domain 1 construct was stable under these conditions and  
259 | migrated at ~90kD (panels A,B). In contrast, the I<sup>111</sup>A/V<sup>114</sup>A mutant domain I protein displayed

261 two distinct bands; the upper band was stable, while the lower band likely corresponded to an ER  
262 form that was largely degraded after 4 hours in cycloheximide (panels A,B). From this we  
263 conclude that cells expressing membrane anchored LAMP2 domain 1 I<sup>111</sup>A/V<sup>114</sup>A are less  
264 efficient at folding the protein but some folded protein makes it to lysosomes, where it is stable.  
265 This difference was accounted for in subsequent functional rescue experiments (Fig. 6D).

266

267 Figure 6D shows that as expected, full length, wild type LAMP2 rescued cholesterol export in  
268 LAMP1/2-deficient MEF cells; membrane anchored LAMP2 domain 1 showed a level of rescue  
269 consistent with its lower capacity for cholesterol binding (cf. Fig. 1F). Importantly, membrane  
270 anchored, LAMP2 domain 1 I<sup>111</sup>A/V<sup>114</sup>A failed to rescue cholesterol export from lysosomes  
271 (Fig. 6D), consistent with its inability to bind cholesterol; shown are the data corrected for the  
272 amount of mature proteins present in lysosomes in these cells. LAMP2 constructs mutated in  
273 both cholesterol-binding sites could not be tested, as they were only poorly delivered to  
274 lysosomes.

275

276 These experiments demonstrate a direct role for LAMP2 in cholesterol export from lysosomes,  
277 and confirm that LAMP2's ability to bind cholesterol correlates with its ability to support  
278 cholesterol export from LAMP-deficient MEF cells. In addition, LAMP proteins bind tightly to  
279 NPC proteins in vitro and in cells, and appear to facilitate cholesterol export from lysosomes.

280

281 LAMP proteins are the most highly abundant membrane glycoproteins of the lysosome, and their  
282 lumenally oriented cholesterol binding sites represent a significant binding site for this important  
283 sterol. We measured  $\sim 7 \times 10^6$  molecules per HeLa cell, representing 0.3mM binding sites in

Suzanne Pfeffer 9/17/2016 12:01 PM  
**Deleted:** cholesterol levels influence the  
ability of LAMP proteins to self-associate;  
when cholesterol is present,

287 | lysosomes. A recent cellular mass spectrometry analysis (26) estimated LAMP proteins to be  
288 | present at 260,000 copies and NPC1 at 29,193 copies per HeLa cell. While the relative  
289 | abundance of these proteins matches the values we report here, their total level was 25 fold lower  
290 | in that study. It is possible that these transmembrane glycoproteins were under-represented in  
291 | due to their unusual protease resistance as proteins of the lysosome membrane, differences in cell  
292 | confluency and/or differences in HeLa cell lines employed.

Suzanne Pfeffer 9/17/2016 12:01 PM

Deleted: 22

294 | Lysosomes have recently been shown to sense and signal amino acid availability to influence  
295 | lysosome biogenesis in relation to cellular need (27), and LAMP oligomerization has been  
296 | reported to correlate with chaperone mediated autophagy (11). Cholesterol levels may influence  
297 | LAMP protein conformation or interaction with other partners to signal the availability of  
298 | endocytosed cholesterol to influence autophagy and cellular metabolism. The ten fold higher  
299 | abundance of LAMP proteins compared with NPC1 protein in HeLa cells suggests that LAMP  
300 | proteins may do more than just facilitate NPC1 function in cholesterol export. Future  
301 | experiments will be needed to fully understand the roles played by these highly abundant  
302 | lysosomal membrane glycoproteins.

Suzanne Pfeffer 9/17/2016 12:01 PM

Deleted: 19

Suzanne Pfeffer 9/17/2016 12:01 PM

Deleted: oligomerization and may

304 | We have shown that LAMP2 binds tightly to the N-terminal domain of NPC1 and also binds  
305 | cholesterol with the same orientation as that domain. LAMP2 also aids in cholesterol export  
306 | from lysosomes. How might LAMP2's cholesterol binding site contribute to cholesterol export?  
307 | Current models suggest that the soluble NPC2 protein binds cholesterol from the internal  
308 | membranes of lysosomes and delivers it to NPC1 at the limiting membrane of this compartment  
309 | (16). One possibility is that NPC2 can deliver cholesterol to both NPC1 and to LAMP2, which

Suzanne Pfeffer 9/17/2016 12:01 PM

Deleted: Our data show

314 is more abundant. This would help drive the cholesterol export process by moving cholesterol  
 315 from the accumulated, luminal lipid stores to the lysosome's limiting membrane. Because  
 316 LAMP2 and NPC1 N-terminal domains bind cholesterol in the same orientation, it makes sense  
 317 that NPC2 (which binds in opposite orientation, ref. 28) could transfer the cholesterol between  
 318 these two proteins. The recent crystal structure of NPC2 bound to the middle, luminal domain  
 319 of NPC1 (29) supports a direct handoff between NPC1 and NPC2 (16). In future work, it will be  
 320 important to elucidate precisely how LAMP2 interacts with both NPC2 and NPC1 to facilitate  
 321 cholesterol export from lysosomes and how cholesterol binding contributes to LAMP2's other  
 322 cellular roles.

Suzanne Pfeffer 9/17/2016 12:01 PM

Deleted: 23

Suzanne Pfeffer 9/17/2016 12:01 PM

Deleted: 24

## 324 References

- 325 1. Xu H, Ren D. 2015. Lysosomal physiology. *Annu Rev Physiol* **77**:57-80.
- 326 2. Schwake M, Schröder B, Saftig P. 2013. Lysosomal membrane proteins and their central role in physiology.  
 327 *Traffic* **14**:739-748.
- 328 3. Saftig P, Klumperman J. 2009. Lysosome biogenesis and lysosomal membrane proteins: trafficking meets  
 329 function. *Nat Rev Mol Cell Biol* **10**:623-35.
- 330 4. Wilke S, Krausze J, Büsow K. 2012. Crystal structure of the conserved domain of the DC lysosomal associated  
 331 membrane protein: implications for the lysosomal glycocalyx. *BMC Biol* **10**:62-77.
- 332 5. Kundra R, Kornfeld S. 1999. Asparagine-linked oligosaccharides protect Lamp-1 and Lamp-2 from intracellular  
 333 proteolysis. *J Biol Chem* **274**:31039-31046.
- 334 6. Granger BL, Green SA, Gabel CA, Howe CL, Mellman I, Helenius A. 1990. Characterization and cloning of  
 335 lgp110, a lysosomal membrane glycoprotein from mouse and rat cells. *J Biol Chem* **265**:12036-12043.
- 336 7. Tanaka Y et al. 2000. Accumulation of autophagic vacuoles and cardiomyopathy in LAMP-2-deficient mice.  
 337 *Nature* **406**:902-906.
- 338 8. Huynh KK, Eskelinen EL, Scott CC, Malevanets A, Saftig P, Grinstein S. 2007. LAMP proteins are required for  
 339 fusion of lysosomes with phagosomes. *EMBO J* **26**:313-324.
- 340 9. Cuervo AM, Dice JF. 1996. A receptor for the selective uptake and degradation of proteins by lysosomes.  
 341 *Science* **273**:501-503.
- 342 10. Cuervo AM, Dice JF. 2000. Unique properties of lamp2a compared to other lamp2 isoforms. *J Cell Sci* **113** Pt  
 343 24:4441-50.

346 | 11. Bandyopadhyay U, Kaushik S, Varticovski L, Cuervo AM. 2008. The chaperone-mediated autophagy receptor  
347 | organizes in dynamic protein complexes at the lysosomal membrane. *Mol Cell Biol* **28**:5747-5763.

348 | 12. Eskelinen EL et al. 2004. Disturbed cholesterol traffic but normal proteolytic function in LAMP-1/LAMP-2  
349 | double-deficient fibroblasts. *Mol Biol Cell* **15**:3132-45.

350 | 13. Schneede A et al. 2011. Role for LAMP-2 in endosomal cholesterol transport. *J Cell Mol Med* **15**:280-295.

351 | 14. Hulce JJ, Cognetta AB, Niphakis MJ, Tully SE, Cravatt BF. 2013. Proteome-wide mapping of cholesterol-  
352 | interacting proteins in mammalian cells. *Nat Methods* **10**:259-64.

353 | 15. Infante RE, Abi-Mosleh L, Radhakrishnan A, Dale JD, Brown MS, Goldstein JL. Purified NPC1 protein: 1.  
354 | Binding of cholesterol and oxysterols to a 1278 amino acid membrane protein. *J Biol Chem*, 283, 1052-1063  
355 | (2008).

356 | 16. Kwon HJ et al. 2009. Structure of N-terminal domain of NPC1 reveals distinct subdomains for binding and  
357 | transfer of cholesterol. *Cell* **137**, 1213-24 (2009).

358 | 17. A.I. Rosenbaum, F.R. Maxfield, Niemann-Pick type C disease: molecular mechanisms and potential therapeutic  
359 | approaches. *J Neurochem* **116**, 789-795 (2011).

360 | 18. Abi-Mosleh L, Infante RE, Radhakrishnan A, Goldstein JL, Brown MS. 2009. Cyclodextrin overcomes  
361 | deficient lysosome-to-endoplasmic reticulum transport of cholesterol in Niemann-Pick type C cells. *Proc Natl*  
362 | *Acad Sci USA* **106**:19316-21

363 | 19. Rosenbaum AI, Zhang G, Warren JD, Maxfield FR. 2010. Endocytosis of beta-cyclodextrins is responsible for  
364 | cholesterol reduction in Niemann-Pick type C mutant cells. *Proc Natl Acad Sci USA* **107**:5477-82.

365 | 20. Ulloa JE, Almaguel FG, Padilla A, Bu L, Liu JW, De Leon M. 2007. Characterization of methyl-beta-  
366 | cyclodextrin toxicity in NGF-differentiated PC12 cell death. *Neurotoxicology* **28**:613-21.

367 | 21. Lu F, Liang Q, Abi-Mosleh L, Das A, De Brabander JK, Goldstein JL, Brown MS. 2015. Identification of  
368 | NPC1 as the target of U18666A, an inhibitor of lysosomal cholesterol export and Ebola infection. *Elife*. 2015  
369 | Dec 8;4. pii: e12177.

370 | 22. Li X, Wang J, Coutavas E, Shi H, Hao Q, Blobel G. 2016. Structure of human Niemann-Pick C1 protein. *Proc*  
371 | *Natl Acad Sci USA* **113**:8212-7.

372 | 23. Griffiths G, Back R, Marsh M. A quantitative analysis of the endocytic pathway in Baby Hamster Kidney  
373 | Cells. *J. Cell Biol.* **109**, 2703-2720 (1989).

374 | 24. Quinn P, Griffiths G, Warren G. 1984. Density of Newly Synthesized Plasma Membrane proteins in  
375 | Intracellular membranes II. Biochemical Studies. *J Cell Biol* **98**:2142-2147.

376 | 25. J.L. Goldstein, S.K. Basu SK, M.S. Brown, Receptor-mediated endocytosis of low-density lipoprotein in  
377 | cultured cells. *Methods Enzymol* **98**, 241-260 (1983).

378 | 26. Itzhak DN, Tyanova S, Cox J, Borner GH. 2016. Global, quantitative and dynamic mapping of protein  
379 | subcellular localization. *eLife* 2016;5:e16950.

380 | 27. Settembre C, Fraldi A, Medina DL, Ballabio A. Signals from the lysosome: a control centre for cellular  
381 | clearance and energy metabolism. *Nat Rev Mol Cell Biol* **14**, 283-96 (2013).

Suzanne Pfeffer 9/17/2016 12:01 PM

**Moved down [2]:** J.L. Goldstein, S.K. Basu SK, M.S. Brown, Receptor-mediated endocytosis of low-density lipoprotein in cultured cells. *Methods Enzymol* **98**, 241-260 (1983). .

Suzanne Pfeffer 9/17/2016 12:01 PM

**Moved down [3]:** <#>Settembre C, Fraldi A, Medina DL, Ballabio A. Signals from the lysosome: a control centre for cellular clearance and energy metabolism. *Nat Rev Mol Cell Biol* **14**, 283-96 (2013). .

Suzanne Pfeffer 9/17/2016 12:01 PM

**Deleted:** 20.

Suzanne Pfeffer 9/17/2016 12:01 PM

**Deleted:** 21

Suzanne Pfeffer 9/17/2016 12:01 PM

**Moved (insertion) [2]**

Suzanne Pfeffer 9/17/2016 12:01 PM

**Deleted:** 22

Suzanne Pfeffer 9/17/2016 12:01 PM

**Moved (insertion) [3]**

28. Xu S, Benoff B, Liou HL, Lobel P, Stock AM. 2007. Structural basis of sterol binding by NPC2, a lysosomal protein deficient in Niemann-Pick type C2 disease. *J Biol Chem* **282**:23525-31.

29. Li X, Saha P, Li J, Blobel G and Pfeffer SR. Clues to the mechanism of cholesterol transfer from the structure of NPC1 middle luminal domain bound to NPC2. *Proc Natl Acad Sci USA* in press (2016)

30. Vergarajaregui S1, Martina JA, Puertollano R. 2011. LAPTMs regulate lysosomal function and interact with mucolipin 1: new clues for understanding mucopolipidosis type IV. *J Cell Sci* 124(Pt 3):459-68.

31. Gong X, Qian H, Zhou X, Wu J, Wan T, Cao P, Huang W, Zhao X, Wang X, Wang P, Shi Y, Gao GF, Zhou Q, Yan N. 2016. Structural Insights into the Niemann-Pick C1 (NPC1)-Mediated Cholesterol Transfer and Ebola Infection. *Cell* **165**:1467-78.

32. Li J, Deffieu MS, Lee PL, Saha P, Pfeffer SR. 2015. Glycosylation inhibition reduces cholesterol accumulation in NPC1 protein-deficient cells. *Proc Natl Acad Sci U S A*. **112**:14876-81.

33. Pettersen EF, Goddard TD, Huang CC, Couch GS, Greenblatt DM, Meng EC, Ferrin TE. 2004. UCSF Chimera-a visualization system for exploratory research and analysis. *J Comput Chem* **25**:1605-12.

**Acknowledgments:** This research was funded by a grant from the Ara Parseghian Medical Research Foundation and NIH DK37332 to SRP. We are grateful to Drs. Christopher Wassif and Forbes Denny Porter (NIH) for independent confirmation of the mass spectrometry results and Dr. Paul Saftig for providing MEF cells lacking LAMP1/LAMP2.

**Figure 1.** Cholesterol binding to LAMP proteins. A. Coomassie-stained SDS-PAGE of purified, secreted human LAMP1, LAMP2 or LAMP domains from LAMP2. B,C. <sup>3</sup>H-cholesterol or <sup>3</sup>H-25 hydroxycholesterol binding to soluble LAMP2 (full length protein). Also shown in C is binding in the presence of 50μM cold hydroxycholesterol. D,E. <sup>3</sup>H-cholesterol binding to indicated, soluble proteins compared with the soluble NPC1 N-terminal domain. F, Cholesterol binding to LAMP2 domains 1 and 2 compared with full length, soluble LAMP2 protein. P values were determined relative to the full length soluble LAMP2 protein. G. Sterol competition (30μM) for <sup>3</sup>H-cholesterol binding to soluble LAMP2. P values were determined

Suzanne Pfeffer 9/17/2016 12:01 PM

Deleted: 23

Suzanne Pfeffer 9/17/2016 12:01 PM

Deleted: 24

Suzanne Pfeffer 9/17/2016 12:01 PM

Moved down [4]: Li J, Deffieu MS, Lee PL, Saha P, Pfeffer SR. 2015. Glycosylation inhibition reduces cholesterol accumulation in NPC1 protein-deficient cells. *Proc Natl Acad Sci U S A*. **112**:14876-81.

Suzanne Pfeffer 9/17/2016 12:01 PM

Deleted: 25.

Suzanne Pfeffer 9/17/2016 12:01 PM

Deleted: 26.

Suzanne Pfeffer 9/17/2016 12:01 PM

Moved down [5]: Pettersen EF, Goddard TD, Huang CC, Couch GS, Greenblatt DM, Meng EC, Ferrin TE. 2004. UCSF Chimera-a visualization system for exploratory research and analysis. *J Comput Chem* **25**:1605-12.

Suzanne Pfeffer 9/17/2016 12:01 PM

Deleted: 27

Suzanne Pfeffer 9/17/2016 12:01 PM

Moved (insertion) [4]

Suzanne Pfeffer 9/17/2016 12:01 PM

Moved (insertion) [5]

Suzanne Pfeffer 9/17/2016 12:01 PM

Deleted: , H. Binding

Suzanne Pfeffer 9/17/2016 12:01 PM

Deleted: or as indicated

Suzanne Pfeffer 9/17/2016 12:01 PM

Deleted: In G,

relative to no cold addition. H, I. pH dependence and kinetics of  $^3\text{H}$ -cholesterol binding to LAMP2. In B, C, E, H and I, a representative experiment is shown; C and E show the average of duplicates. In C, the background counts in reactions containing the control protein, GFP-binding protein, were subtracted; in D and E, the control was TIP47 protein. D, F, and G show the combined results of two experiments in duplicate. Numbers at right (A) indicate mass in kD for this and all subsequent figures. Reactions contained D, E, G, H, I, 500nM total cholesterol; F, 5 $\mu\text{M}$  total cholesterol; B and C were carried out using increasing concentrations of the indicated sterol.

**Figure 1-figure supplement 1.** Diagram of constructs used.

**Figure 2.** Cholesterol binding to LAMP2 is competed by 25-hydroxycholesterol (B), cholesterol (C), 7-ketocholesterol (D) but not cholesterol sulfate (A) or epicholesterol (C). The structures above indicate the regions of the sterol that differ from cholesterol. In C, the background obtained in reactions containing GFP was subtracted. All panels used 50nM  $^3\text{H}$ -cholesterol and the indicated amounts of competitors.

**Figure 3.** Mass spectrometry identification of small molecules released from LAMP2 after chloroform:methanol (2:1) extraction. A, masses from cholesterol standard; B, masses of LAMP2-bound material; C, Copper sulfate/phosphoric acid detection of indicated markers after thin layer chromatography compared with material eluted from soluble LAMP2 (50 $\mu\text{g}$ ). Shown are the results of a representative experiment carried out twice.

Suzanne Pfeffer 9/17/2016 12:01 PM

Deleted: shows

Suzanne Pfeffer 9/17/2016 12:01 PM

Deleted: ) and

Suzanne Pfeffer 9/17/2016 12:01 PM

Deleted: lanosterol

**Figure 4.** LAMP2 interacts with NPC1 and NPC2 proteins. A, Anti-GFP immunoprecipitation from HEK293T cells grown in FBS containing medium expressing GFP or mouse NPC1-GFP. The blot was developed with ECL. Upper panel, anti-GFP immunoblot (100% elution); lower panel, anti-LAMP2 immunoblot to detect endogenous, full length protein (100% elution). B, C, co-immunoprecipitation of LAMP2 and NPC1-GFP in cells grown in FBS, LPDS (5%) or LPDS + cyclodextrin (1mM) for 24 hours. Left panels, 1% inputs; right panels, 50% elutions. Error bars represent SEM for two combined experiments carried out in duplicate; P value is from comparison with LPDS by two-tailed Student's t-test. B shows duplicate reactions to document reproducibility. D, Anti-GFP immunoprecipitation of HEK293T cells grown in FBS expressing GFP-MCOLN1 or mouse NPC1-GFP. GFP-MCOLN1 occurs as a ~90kD form, a proteolytically processed form, and as higher oligomers (30). Left panels, inputs (2%); right panels, total elution carried out in duplicate. GFP proteins are green; LAMP2 is presented in red. Shown is a representative experiment carried out twice in duplicate.

Suzanne Pfeffer 9/17/2016 12:01 PM  
Deleted: and oligomerizes upon cholesterol depletion.

Suzanne Pfeffer 9/17/2016 12:01 PM  
Deleted: immune-precipitation of

Suzanne Pfeffer 9/17/2016 12:01 PM  
Deleted: to show inputs;

Suzanne Pfeffer 9/17/2016 12:01 PM  
Deleted: .

Suzanne Pfeffer 9/17/2016 12:01 PM  
Deleted: D, Anti-LAMP1 immunoblot from HEK293T cells treated 24h as indicated as in B; all lanes shown were from a single film and exposure. E, Human LAMP1 dimer detected in experiments such as that shown in D; shown is the normalized ratio of dimer to monomer from five combined experiments (error bars = SEM); P value is from comparison with LPDS, determined by two-tailed Student's t-test

**Figure 5.** LAMP2 binds NPC1 and NPC2 proteins. A, B, Structures of NPC1 (31; pdb 3jd8) and NPC2 (28; pdb 2hka) proteins; C,E, Microscale thermophoresis (E) or fluorescence (C) obtained with mixtures of soluble, AF647 labeled-NPC1 N-terminal domain or AF647-RNAase B with increasing concentrations of soluble LAMP2 in 1μM cholesterol. D,F, Microscale thermophoresis of AF647 labeled-NPC2 with increasing concentrations of soluble LAMP2 or RNAase B in 1μM cholesterol sulfate. For C-F, a representative experiment carried out at least twice is shown.

Suzanne Pfeffer 9/17/2016 12:01 PM  
Deleted: 27



504 **Figure 5 -- figure supplement 1.** Quantitation of NPC1 (A) and LAMP2 (B) proteins in HeLa  
505 and HEK293T cells. The values at the top of each gel represent the amount of purified protein or  
506 total cell extract analyzed, determined by BCA protein assay. The immunoblot was developed  
507 using rabbit anti-NPC1 or mouse anti-LAMP2 antibodies followed by detection with  
508 IRDye800CW goat anti-mouse or donkey anti-rabbit antibodies. Shown is an example of an  
509 experiment carried out in duplicate; subconfluent cultures were analyzed. Purified NPC1 is  
510 slightly smaller than that in the extract because it was deglycosylated (see Methods).

Suzanne Pfeffer 9/17/2016 12:01 PM

Deleted: (LiCor).

511  
512 **Figure 6.** A, predicted structure model of LAMP2 domain 1; residues I111 and V114 are  
513 highlighted in red. B, Relative  $^3\text{H}$ -cholesterol binding to soluble LAMP 2 domain 1 or LAMP2  
514 domain 1-I<sup>111</sup>A/V<sup>114</sup>A. Shown is combined data from 5 independent experiments carried out in  
515 duplicate, in the presence of 50nM  $^3\text{H}$ -cholesterol. Inset, SDS-PAGE analysis of wild type (left)  
516 and domain 1-I<sup>111</sup>A/V<sup>114</sup>A (right) proteins analyzed. P value was determined by two-tailed  
517 Student's t-test. C, flow cytometry analysis of mean fluorescence of GFP rescue constructs in  
518 lentivirus-transduced cells (>20,000 cells analyzed). D, Cholesteryl oleate synthesis in MEF  
519 cells lacking LAMP1 and LAMP2 after rescue with either full length, membrane anchored  
520 LAMP2, membrane anchored LAMP2 domain 1, or membrane anchored LAMP2 domain 1-  
521 I<sup>111</sup>A/V<sup>114</sup>A. C-terminally GFP-tagged, rescue proteins were stably expressed using lentivirus  
522 transduction; shown is the combined result of 2 independent experiments, normalized for the  
523 amount of mature protein in each sample (Fig. 6-Supp. Fig. 2) relative to the amount of rescue  
524 seen with full length LAMP2 protein. P-values are in relation to full length for domain 1, or to  
525 domain 1 for the mutant protein, and were determined by one way ANOVA. E, confocal light

Suzanne Pfeffer 9/17/2016 12:01 PM

Deleted: .

528 microscopic analysis of GFP rescue construct localization (green) and endogenous LAMP1  
529 protein (red) in transiently transfected HeLa cells; bars represent 20µm.

530

531 **Figure 6 -- figure supplement 1.** Immunoblot analysis of LAMP2 constructs from lentivirus  
532 transduced LAMP1/LAMP2-knock out MEF cells. A, total cell extract from cells expressing  
533 membrane anchored, GFP-LAMP2 domain 1 or GFP-LAMP2 domain 1-I<sup>111</sup>A/V<sup>114</sup>A; B,  
534 migration of the constructs indicated, before or after 4 hours cycloheximide treatment (50  
535 µg/ml). Panel A was developed as in Fig. 4B; panel B was developed as in Fig. 4A.

536

537

538

### 539 **Materials and Methods**

540 Cholesterol, epicholesterol and sodium cholesteryl sulfate were from Sigma (St. Louis, MO); 24-  
541 hydroxycholesterol (24-HC) was a gift from Rajat Rohatgi (Stanford University, Stanford, CA);  
542 25-hydroxycholesterol and 7-ketocholesterol were from Steraloids (Newport, RI) or Avanti Polar  
543 Lipids (Alabaster, AL); [1,2-<sup>3</sup>H]cholesterol (50 Ci/mmol) and 25-[26,27-<sup>3</sup>H] hydroxycholesterol  
544 were from American Radiolabeled Chemicals (St. Louis, MO). Ni-NTA agarose was from  
545 Qiagen (Valencia, CA); freestyle 293<sup>TM</sup> expression medium and Dulbecco's modified Eagle's  
546 medium (DMEM) was from Life Technologies (Carlsbad, CA); lipoprotein deficient serum was  
547 from KALEN Biomedical (Montgomery Village, Maryland). Pierce<sup>TM</sup> Protein Concentrators  
548 PES were from Thermo Fisher Scientific (Grand Island, NY); PD-10 desalting columns and Q-  
549 Sepharose were from GE Healthcare Life Sciences (Pittsburgh, PA); pFastBac NPC1-N-terminal  
550 domain plasmid, LAMP1-mGFP and MCOLN1-pEGFP C3 were from Addgene (Cambridge,  
551 MA); pGEM-LAMP2 was from Sino Biological Inc; mouse anti-human LAMP1 and LAMP2  
552 antibody culture supernatants were from Developmental Studies Hybridoma Bank (University of  
553 Iowa, Iowa city, IA). Chicken anti-GFP antibody was from Aves Labs (Tigard, Oregon); IRDye

Suzanne Pfeffer 9/17/2016 12:01 PM

Deleted: , lanosterol

Suzanne Pfeffer 9/17/2016 12:01 PM

Deleted: was

Suzanne Pfeffer 9/17/2016 12:01 PM

Deleted: was

800CW donkey anti-chicken and IRDye 680RD donkey anti-mouse antibodies were from LI-COR, Inc. (Lincoln, NE); anti-chicken-HRP conjugate was from Promega (Sunnyvale, CA); goat anti-mouse-HRP conjugate was from BioRad (Hercules, CA); ECL Western Blotting Substrate was from Thermo Scientific (Rockford, IL).

**Buffers** Buffer A: 50mM ammonium acetate, pH4.5, 150mM NaCl, 0.004% NP-40; buffer B: 50mM MES, pH5.5, 150mM NaCl, 0.004% NP40; buffer C: 50mM MES, pH6.5, 150mM NaCl, 0.004% NP-40; buffer D: 50mM HEPES, pH7.5, 150mM NaCl, 0.004% NP-40; buffer E: 25mM Tris, pH7.4, 150mM NaCl; RIPA buffer: 50mM Tris, pH7.4, 150mM NaCl, 1% NP-40, 0.2% deoxycholic acid, 0.1% SDS.

**Plasmids** cDNAs encoding full length, soluble human LAMP1(1-382), human LAMP2 (1-375) and domain 1 of human LAMP2 (1-231) were PCR amplified from LAMP1-mGFP and pGEM-LAMP2 respectively. The PCR products were inserted into pEGFP-N3 vector. The constructs were assembled to have an unstructured GSTGSTGSTGA linker at the C terminus, followed by a His<sub>10</sub> tag and a FLAG tag. For LAMP2, another His<sub>10</sub> tag was added downstream of the FLAG tag for improved purification. LAMP2 domain 2 was prepared by deleting residues 39-219 from the full length, soluble domain construct. FUGENE6 was used for transient transfection of HeLa cells. Membrane anchored rescue constructs were stably expressed in LAMP1/2 deficient MEF cells by lentivirus transduction and were comprised of full length LAMP2 bearing a C-terminal GFP (LAMP2-GFP), or LAMP2-GFP Δ194-368 (encoding membrane anchored domain 1) or the latter construct carrying point mutations.

**Cell culture** All cells were cultured at 37°C and under 5% CO<sub>2</sub> in Dulbecco's modified Eagle's medium supplemented with 7.5% fetal bovine serum, 100U/ml penicillin and 100 µg/ml streptomycin, unless indicated. HEK293F suspension cells were cultured at 37°C under 5% CO<sub>2</sub> in Freestyle 293™ medium. Mouse embryonic fibroblasts from LAMP1/LAMP2 double knockout mice (11,12) were the generous gift of Dr. Paul Saftig (Christian-Albrechts-Universität Kiel, Germany). In some experiments, cells were cultured in lipoprotein deficient serum (5%).

Suzanne Pfeffer 9/17/2016 12:01 PM

Deleted:

588 **Protein purification** pFastBac NPC1-N-terminal domain plasmid was used to make virus for  
589 infection of Sf9 insect cells. Seventy-two hours after infection, Sf9 cultures were spun down and  
590 ammonium sulfate added to achieve 60% saturation. The resulting precipitate was re-suspended  
591 buffer E and incubated with Ni-NTA resin overnight at 4°C. After washing with buffer E with  
592 25mM imidazole, the protein was eluted with buffer E plus 250mM imidazole, and further  
593 purified using Q-Sepharose.

594  
595 HEK293F cells were transfected using 293fection according to the manufacturer. After 72h,  
596 supernatants were collected after spinning 3000 rpm for 5min. To purify proteins for [<sup>3</sup>H]  
597 cholesterol binding, supernatants were subjected to 90% ammonium sulfate precipitation. After  
598 spinning at 13000 rpm for 30min, pellets were re-suspended in buffer E plus 25mM imidazole  
599 and incubated with Ni-NTA resin overnight at 4°C, followed by washing with the same buffer.  
600 Bound proteins were eluted with buffer E plus 250mM imidazole. Proteins were concentrated  
601 and buffer exchanged into buffer C with Pierce<sup>TM</sup> Protein Concentrators PES (10kD cut-off).  
602 Proteins were either used immediately or stored at -80°C after snap freezing in liquid nitrogen.  
603 For cholesterol extraction and thin layer chromatography, supernatants were adjusted to pH 7.4  
604 and incubated with Ni-NTA resin overnight at 4°C; after washing with buffer E plus 25mM  
605 imidazole, proteins were eluted with buffer E plus 250mM imidazole. Proteins were desalted into  
606 PBS using a PD-10 column.

607  
608 **<sup>3</sup>H-cholesterol binding** Each reaction was carried out in a final volume of 80–100 µl of buffer  
609 A, B, C or D containing 0.1–1µg purified His-tagged protein and 10–400 nM <sup>3</sup>H-cholesterol  
610 diluted with 0.1–50µM cholesterol. For competition assays, reactions were in 80µl buffer C  
611 (50mM MES, 150mM NaCl, 0.004% NP-40, pH6.5) with 0.1µg full length soluble LAMP2  
612 protein and 50nM <sup>3</sup>H-cholesterol, competition was started by adding vehicle (ethanol) or  
613 different concentrations of competitors as indicated. After incubation overnight at 4°C, the  
614 mixture was loaded onto a column packed with 30µl Ni-NTA agarose beads. After incubation for  
615 10min, each column was washed with 5 ml of buffer C plus 10mM imidazole. The protein-bound  
616 <sup>3</sup>H-cholesterol was eluted with 250mM imidazole-containing buffer C and quantified by  
617 scintillation counting. For competition experiments, assays were carried out in the presence of  
618 30µM unlabeled sterol.

619

620 **Mass Spectrometry** Samples were analyzed by LC/MS on an Agilent 1260 HPLC and Bruker  
621 microTOF-Q II mass spectrometer. Full scan mass and product ion spectra were acquired in  
622 positive ion mode, using a Phenomenex Kinetex C18 2.6u 2.1x100mm column, and an initial  
623 condition of 30%, 0.1% formic acid in water/70% methanol.

624

625 **Thin Layer Chromatography** Full length soluble LAMP2, and domains 1 and 2 of LAMP2  
626 were purified as described above. Extraction was performed by adding 3 sample volumes of  
627 chloroform/methanol (2:1, v/v) to the samples. After repeating once more, extracts were pooled  
628 and dried under nitrogen. The extracts were re-dissolved in 50-100µl chloroform/methanol (2:1,  
629 v/v). Samples were spotted onto a Silica gel plate. The plate was developed with isopropanol  
630 until the front reached 1cm above the loading position; after drying under airflow, the plate was  
631 further developed using 2% methanol in chloroform until the front reached the top of the plate.  
632 The plate was sprayed with 10% CuSO<sub>4</sub> in 4% or 8% phosphoric acid and heated at 180°C to  
633 visualize the samples.

634

635 **Co-immunoprecipitation** HEK293T cells expressing pEGFP-N1, pEGFP-N1-mNPC1 or  
636 pEGFP-C3-MCOLN1 were harvested 24–48 h post-transfection and lysed in lysis buffer (50 mM  
637 MES, pH 5.5, 150 mM NaCl and 0.1% digitonin) supplemented with protease inhibitors. After  
638 30min on ice, lysates were spun at 15,000 g for 15 min, and protein concentrations of the  
639 supernatants were measured. Equal amounts of extract protein were incubated with GFP-binding  
640 protein-conjugated agarose for 2 h at 4°C. Immobilized proteins were washed 4 times with 1ml  
641 lysis buffer, eluted with 2× SDS loading buffer, and subjected to BioRad Mini-PROTEIN TGX  
642 4-20% gradient gels. After transfer to nitrocellulose membrane and antibody incubation, blots  
643 were detected with ECL western blotting detection substrate or visualized using LI-COR  
644 Odyssey Imaging System.

645

#### 646 **Microscale Thermophoresis (MST)**

647 MST experiments were performed on a Monolith NT.115Pico instrument (Nanotemper  
648 Technologies). Briefly, His<sub>6</sub>-NPC1 N-terminal domain, RNase B or NPC2 were labeled using  
649 the RED-NHS (Amine Reactive) Protein Labeling Kit (Nanotemper Technologies). A constant

Suzanne Pfeffer 9/17/2016 12:01 PM

Deleted: N1-mNPC1

Suzanne Pfeffer 9/17/2016 12:01 PM

Deleted: SDS-PAGE

Suzanne Pfeffer 9/17/2016 12:01 PM

Deleted: .

... [1]

654 concentration of 6nM labeled protein was mixed with binding partners with a final buffer  
655 condition of 50 mM MES, pH 5.5, containing 150 mM NaCl, 0.004% NP-40. Premium coated  
656 capillaries contained 16 sequential, 2 fold serial dilutions. Analysis was at 40% laser power for  
657 30 sec, followed by 5 sec cooling. Data were normalized to fraction of bound (0=unbound,  
658 1=bound). The dissociation constant  $K_D$  was obtained by plotting the normalized fluorescence  
659  $F_{\text{norm}}$  against the logarithm of the different concentrations of the dilution series according to the  
660 law of mass action.

661

#### 662 **Quantitation of intracellular LAMP2 and NPC1 protein**

663 HeLa and HEK293T cells were grown to sub-confluence in DMEM supplemented with 7.5%  
664 FBS. One 10cm dish of cells was washed 3 times with cold PBS, then lysed with 500 $\mu$ l RIPA  
665 buffer with protease inhibitor cocktail (Sigma). After 30min on ice, the lysate was centrifuged at  
666 13000 rpm for 15min at 4°C. The resulting supernatant was transferred to a new tube and  
667 protein was measured by BCA assay. Lysates were resolved by SDS-PAGE, using different  
668 amounts of purified human LAMP2 or NPC1 protein as standards. After transfer to  
669 nitrocellulose, the blot was probed with anti-human LAMP2 or NPC1 antibody followed by  
670 IRDye 800CW labeled anti mouse (for LAMP2) or rabbit (for NPC1) secondary antibody, and  
671 visualized using a LI-COR Odyssey Imaging System and analyzed using ImageJ software.  
672 Calculations were based on molecular weights of 45874 for LAMP2 and 142167 for NPC1  
673 polypeptide chains, and neglected glycan contribution, which is not measured in the protein  
674 assay employed. Purified, full length NPC1 protein was the gift of Dr. Xiaochun Li (Rockefeller  
675 University) and was N-glycanase treated.

676

677 | **Other Methods** Confocal immunofluorescence microscopy was carried out as described (32).

678 Cells grown on coverslips were fixed with 3.7% (vol/vol) paraformaldehyde for 15 min at room  
679 temperature. LAMP1 staining was performed with sequential incubation of mouse anti-LAMP1  
680 culture supernate and Alexa Fluor 594 goat anti-mouse antibody (1:1,000, Invitrogen), each for 1  
681 h at room temperature. Coverslips were mounted using Mowiol and imaged using a Leica SP2  
682 confocal microscope and Leica software with a 60 $\times$ 1.4 N.A. Plan Achromat oil immersion  
683 lens and a charge-coupled device camera (CoolSNAP HQ, Photometrics). Flow cytometry was

Suzanne Pfeffer 9/17/2016 12:01 PM  
Deleted: 25

685 | carried out on a FACScan Analyzer on gently trypsinized cells fixed as described above (32).  
686 | Structures were presented in drawings created using Chimera software (33).

Suzanne Pfeffer 9/17/2016 12:01 PM

Deleted: 25

Suzanne Pfeffer 9/17/2016 12:01 PM

Deleted: 26

687 | **Cholesterol Ester Formation** LAMP1/LAMP2-deficient MEF cells were cultured in DMEM  
688 | medium with 5% (vol/vol) LPDS for two days and assayed (25, 32) with minor modification.

Suzanne Pfeffer 9/17/2016 12:01 PM

Deleted: 18,

689 | After 48 h, 100 µg/mL LDL, 50 µM lovastatin, and 50 µM sodium mevalonate were added for  
690 | 5h. Cells were pulse labeled for 4 h with 0.1 mM sodium [<sup>14</sup>C]oleate (American Radiolabeled  
691 | Chemicals)–albumin complex. Cells were washed two times with 2 mL 50 mM Tris, 150 mM  
692 | NaCl, 2 mg/mL BSA, pH 7.4, followed by 2 mL 50 mM Tris, 150 mM NaCl, pH 7.4. Cells were  
693 | extracted and rinsed with hexane-isopropanol (3:2), pooled, and evaporated. After resuspending  
694 | each sample in 60 µl hexane, 4 µL of lipid standard containing 8 µg/mL triolein, 8 µg/mL oleic  
695 | acid, and 8 µg/mL cholesteryl oleate was added. Samples were spotted onto a silica gel 60 plastic  
696 | backed, thin layer chromatogram and developed in hexane. Cholesteryl oleate was identified  
697 | with iodine vapor, scraped from chromatograms, and radioactivity determined by scintillation  
698 | counting in 10 mL Biosafe II.

699 |  
700 | **Statistical Analysis--** Minimum sample sizes were determined assuming 5% standard error  
701 | and > 95% confidence level. P values were determined using Graphpad Prism software and are  
702 | indicated in all figures according to convention: \* P ≤ 0.05; \*\* P ≤ 0.01; \*\*\* P ≤ 0.001; \*\*\*\* P ≤  
703 | 0.0001. Error bars represent standard error of the mean.
