# Supplementary material for: Lysosomal membrane glycoproteins bind cholesterol and contribute to lysosomal cholesterol export
Source: eLife journal article supplement (doi:10.7554/elife.21635), 2016-09-24

A

Purified NPC1 protein    HeLa    HEK293T

75ng 50ng 25ng 10ng 5ng    17.5μg 17.5μg    30μg 30μg

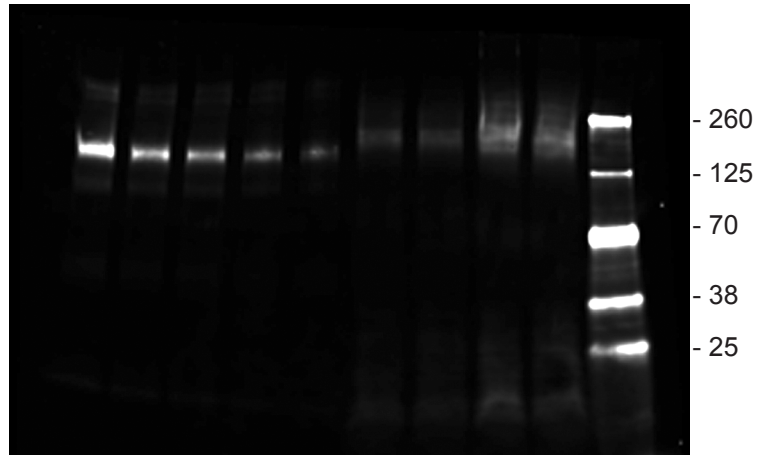

B

Purified LAMP2 protein    HeLa    HEK293T

150ng 100ng 75ng 50ng 25ng    91μg 91μg    150μg 150μg

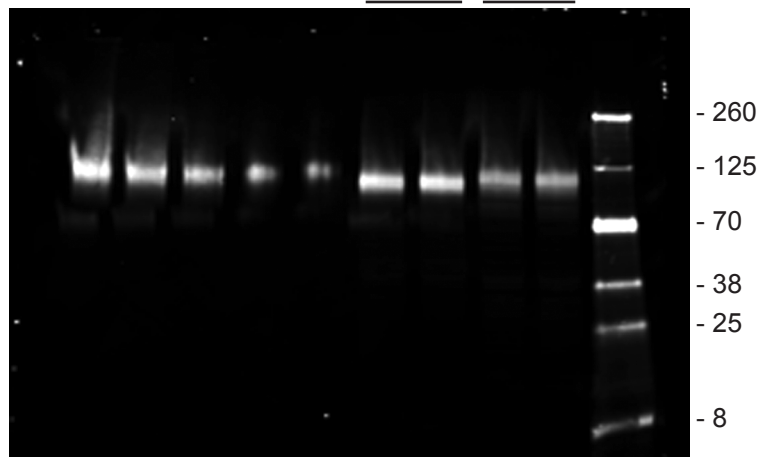

Supplement: supp [file elife-21635-supp-v1.zip]
