# Supplementary figures and images for: Lysosomal membrane glycoproteins bind cholesterol and contribute to lysosomal cholesterol export
Source: eLife journal article supplement (doi:10.7554/elife.21635), 2016-09-24

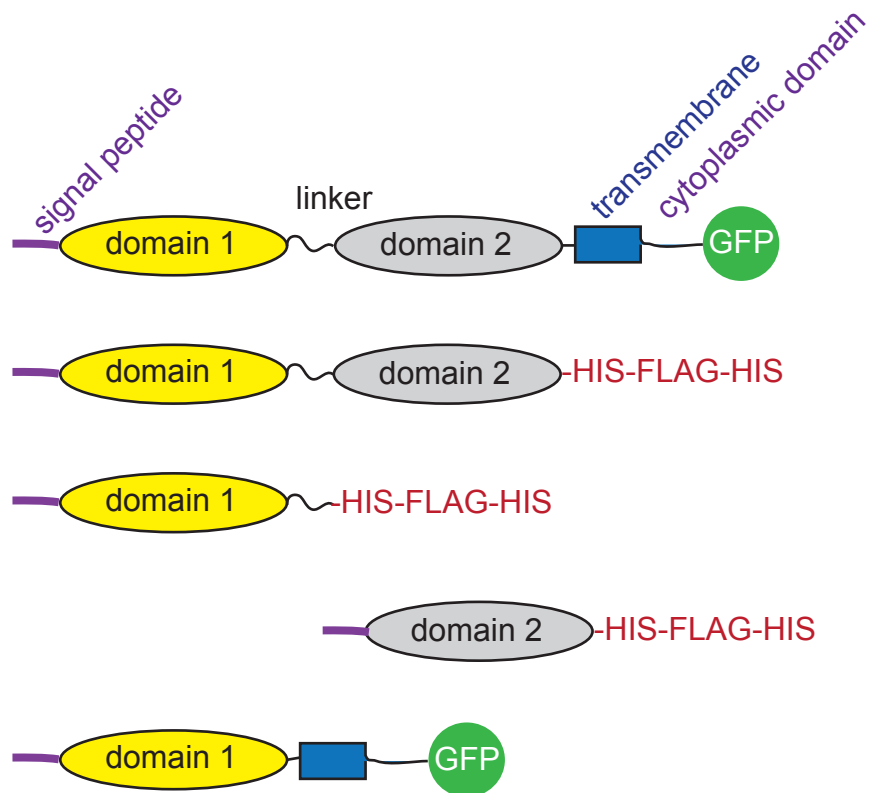

LAMP-GFP

Soluble LAMP

Soluble domain 1

Soluble domain 2

Anchored domain 1

Supplement: supp [file elife-21635-supp-v1.zip]

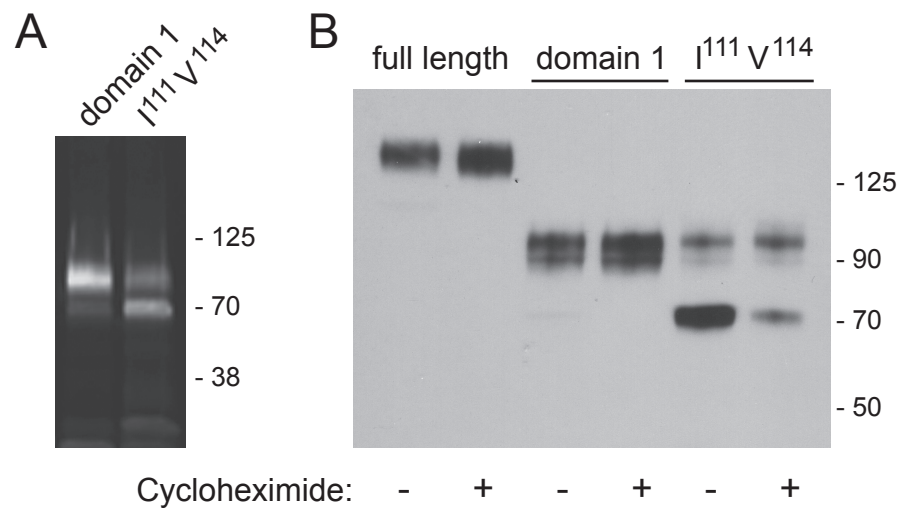

Figure 6--Figure Supp. 1

Supplement: supp [file elife-21635-supp-v1.zip]
